# Supplementary material for: Increased number concentrations of small particles explains perceived stagnation in air quality over Korea
Source: Copernicus journal article supplement (doi:10.5194/egusphere-2024-1208), 2024-07-23
Supplement: Supplementary file [file egusphere-2024-1208-AC1-supplement.pdf]

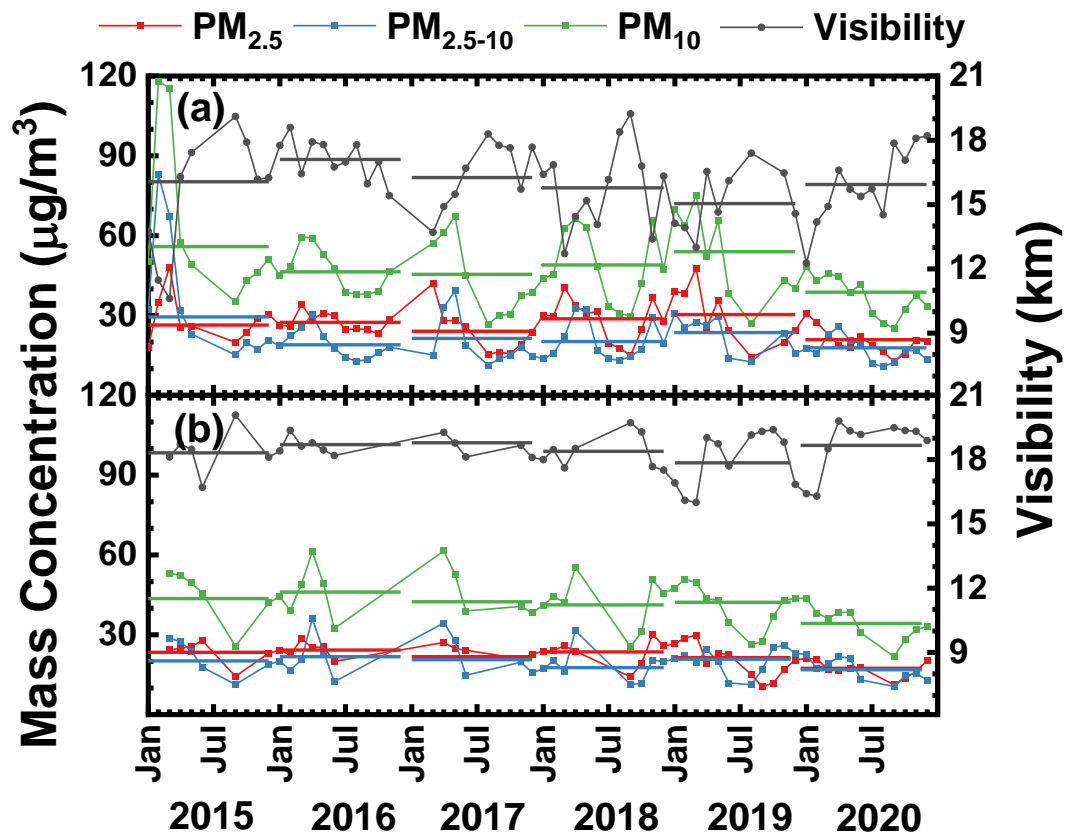

Figure 2: Yearly and Monthly particulate matter (PM) mass concentration and visibility in (a) Seoul and (b) Ulsan.

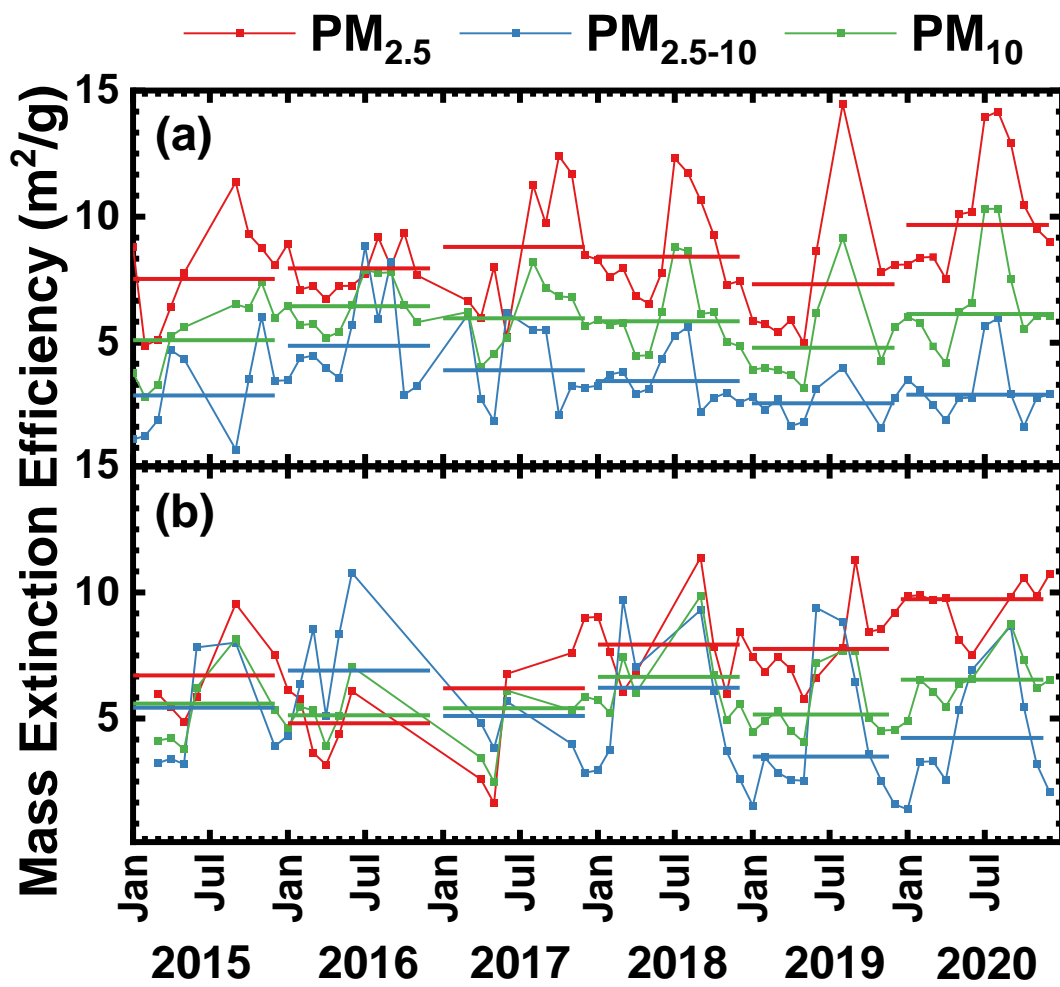

Figure 3: Yearly and Monthly average mass extinction efficiency (MEE) in (a) Seoul and (b) Ulsan

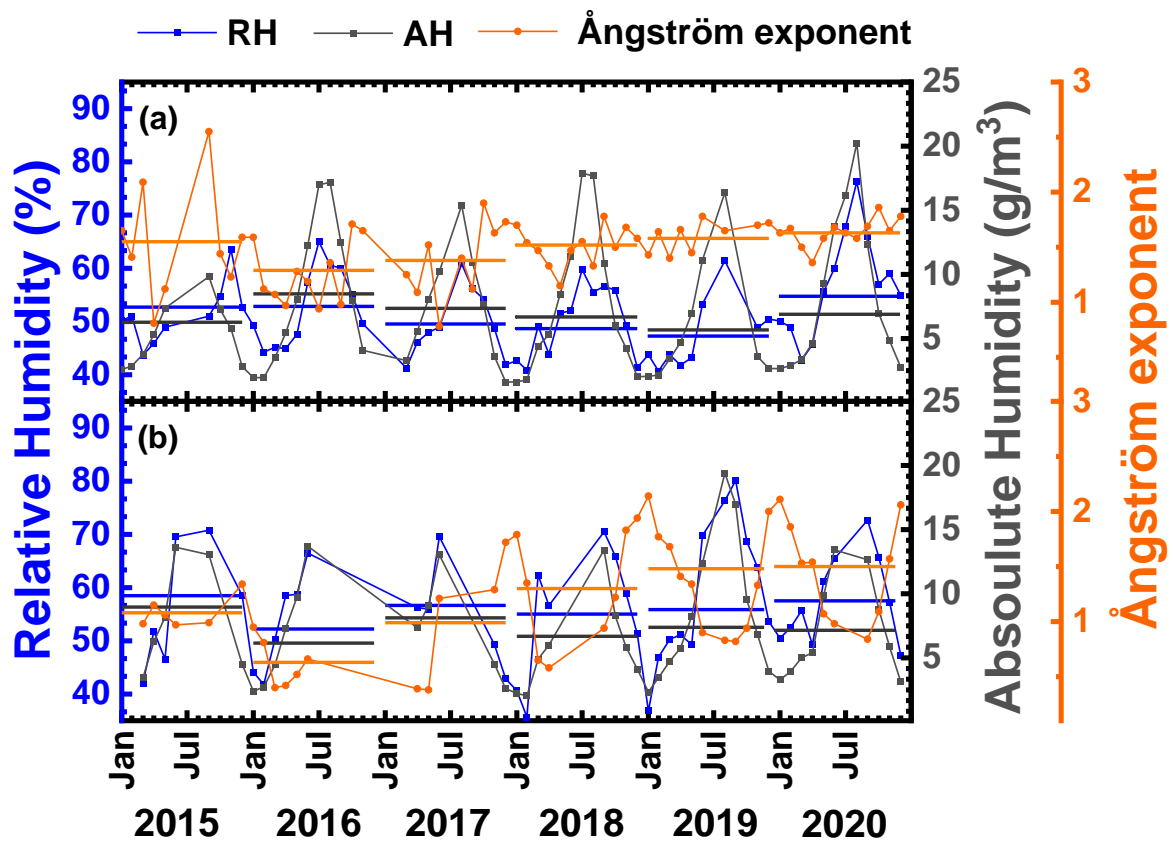

Figure 4: Yearly and Monthly average Ångström exponent, relative and absolute humidity in (a) Seoul and (b) Ulsan.
